# Supplementary material for: Extracellular matrix-based gene signature for predicting prognosis in colon cancer and immune microenvironment
Source: PubMed Central journal article supplement — Transl Cancer Res. 2023 Feb 15;12(2):321–39. doi: 10.21037/tcr-22-2036 (PMC10007896; doi:10.21037/tcr-22-2036), 2023-02-15
Supplement: tcr-12-02-321-dss.pdf [file tcr-12-02-321-dss.pdf]

## Data Sharing Statement

|                     |                                                                                                                                                     |                                                                                                                 |
|---------------------|-----------------------------------------------------------------------------------------------------------------------------------------------------|-----------------------------------------------------------------------------------------------------------------|
| <b>Article Info</b> | <a href="https://dx.doi.org/10.21037/tcr-22-2036">https://dx.doi.org/10.21037/tcr-22-2036</a>                                                       |                                                                                                                 |
| <b>Item</b>         | <b>Question</b>                                                                                                                                     | <b>Authors' Response<br/>(place "-" if not applicable)</b>                                                      |
| 1                   | Would you like to share data collected for your study to others?                                                                                    | Yes                                                                                                             |
| 2                   | If not, would you like to share the reason for your decision?                                                                                       | -                                                                                                               |
| 3                   | What data in particular will be shared?                                                                                                             | Statistical analysis plan will also be shared if requested.                                                     |
| 4                   | Any other documents will be shared? Such as study protocol, statistical analysis plan, informed consent form, clinical study report, analytic code. | -                                                                                                               |
| 5                   | When will data availability begin?                                                                                                                  | From the publication date.                                                                                      |
| 6                   | When will data availability end?                                                                                                                    | Two years within the publication date, since the analysis methods may be updated over time.                     |
| 7                   | To whom will you share the data?                                                                                                                    | Medical oncologists who are interested in studies of colon cancer.                                              |
| 8                   | For what type of analysis or purpose?                                                                                                               | For analysis to predict the prognosis of colon cancer.                                                          |
| 9                   | How or where can the data/documents be obtained?                                                                                                    | Emails could be sent to the address 13601893105@163.com                                                         |
| 10                  | Any other restrictions?                                                                                                                             | We may balance the potential benefits and risks for each request and then provide the data that could be shared |
