# Supplementary material for: Extracellular matrix-based gene signature for predicting prognosis in colon cancer and immune microenvironment
Source: PubMed Central journal article supplement — Transl Cancer Res. 2023 Feb 15;12(2):321–39. doi: 10.21037/tcr-22-2036 (PMC10007896; doi:10.21037/tcr-22-2036), 2023-02-15
Supplement: tcr-12-02-321-supplementary.pdf [file tcr-12-02-321-supplementary.pdf]

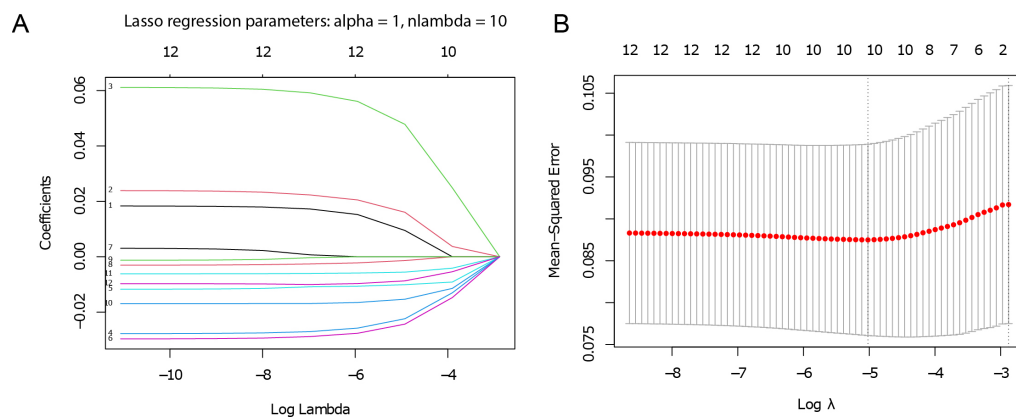

**Figure S1** The LASSO Cox regression analysis. (A,B) The LASSO Cox regression analysis was employed to identify the most robust prognostic FRGs. LASSO, least absolute shrinkage and selection operator.
